# Supplementary material
Source: Springer Nature journal article supplement (http://www.nature.com/nbt/journal/v26/n2/extref/nbt0208-169-S1.pdf)
Supplement: nbt0208-169-S1.pdf [file nbt0208-169-S1.pdf]

## Online Supplemental Note

### 1. Calculation of petroleum equivalent price of biomass feedstock

The petroleum energy equivalent (LHV basis) price of biomass feedstock is calculated as follows:

$$\frac{\$}{\text{tonne dry biomass}} \times \frac{\text{tonne dry biomass}}{\text{GJ}} \times \frac{\text{GJ}}{\text{barrel oil}} = \frac{\$}{\text{barrel oil}}$$

$$\frac{\$50}{\text{tonne dry biomass}} \times \frac{\text{tonne dry biomass}}{17.4 \text{ GJ}} \times \frac{5.8 \text{ GJ}}{\text{barrel oil}} = \frac{\$16.67}{\text{barrel}}$$

### 2. Calculation of land fuel yield.

Fuel yield per unit land area  $Y_{G/L}$  is calculated as follows:

$$Y_{G/L} = Y_{P/F} * P \quad [2]$$

Where  $Y_{P/F}$  is the process yield (GJ/dry ton biomass) and P is the productivity of feedstock production (dry tons/hectare/year).

Table S1. Process yields and crop productivities used in land fuel yield calculation.

|                     | Process Yield, $Y_{P/F}$ | Crop Productivity, P | Land Fuel Yield, $Y_{G/L}$ |
|---------------------|--------------------------|----------------------|----------------------------|
| Feedstock           | GJ/dry ton               | dry ton/hectare/year | GJ/ha/year                 |
| Biomass energy crop | 10.9 <sup>a</sup>        | 12.4 <sup>d</sup>    | 135.2                      |
| Corn kernels        | 9.5 <sup>b</sup>         | 8.8 <sup>e</sup>     | 83.6                       |
| Soybeans            | 6.6 <sup>c</sup>         | 2.8 <sup>f</sup>     | 18.5                       |

<sup>a</sup>Mature technology biorefinery yielding 105.4 gallons ethanol/dry ton and 17.6 gallons FT diesel/dry ton.<sup>1</sup>

<sup>b</sup>Corn dry mill yielding 2.8 gallons ethanol/bushel.<sup>2</sup>

<sup>c</sup>Biodiesel process yielding 0.2 kg biodiesel/kg soybean.<sup>3</sup>

<sup>d</sup>Based on estimated current yield for switchgrass, assumed to be 5 dry ton/acre/year.<sup>4</sup>

<sup>e</sup>Average corn kernel yield in 2006, 149.1 bushels/acre<sup>5</sup>

<sup>f</sup>Average soybean yield in 2006, 42.7 bushels/acre<sup>5</sup>

### **3. Definition of process scenarios.**

All scenarios are modeled using Aspen Plus simulation software, and process economics evaluated using discounted cash flow profitability analysis. Important aspects of process scenarios include: configuration and integration of process steps (unit operations), feedstock cost and composition, plant scale, assumed technological performance or process steps (e.g. yields and rates of fermentation and hydrolysis), availability of preexisting infrastructure, extent of allowance for costs and risks associated with first-of-a-kind plants, and financial parameters (e.g. rate of return, debt:equity ratio). Variation due to these factors is often due to, and further compounded by, differences in the intended purpose for which designs and cost estimates are made. A design for a first plant based on technology proven today is, for example, entirely different from a design for an  $n^{\text{th}}$  plant based on technology likely to be available soon, which is also entirely different from a production facility based on mature technology that has benefited from both extensive field experience as well as R&D-driven advances. In light of the many factors implicit in cost estimates for bioenergy processes, it is important to clearly define process scenarios, and it is not surprising that cost estimates vary widely among various sources even for apparently similar processes. Table S2 lists parameter values for the current technology scenario (Figures 1, 3, 4), mature technology scenario (Figure 3), and the advanced non-biological steps scenario (scenario 2, Figures 2 & 4).

Table S2. Parameter values for scenarios presented in Figures 1 and 2.

| Process Step                              | Current technology Scenario 1 <sup>a</sup> | Mature technology | Advanced non-biological steps Scenario 2 <sup>a</sup> |
|-------------------------------------------|--------------------------------------------|-------------------|-------------------------------------------------------|
| Feedstock Rate (dry tons/day)             | 2,205                                      | 5,000             | 5,000                                                 |
| EtOH Yield (gal/dry ton)                  | 74.5                                       | 105.3             | 82.5                                                  |
| Pretreatment Method                       | Dilute Acid                                | AFEX              | AFEX                                                  |
| Pretreatment Acid Conc. (wt. %)           | 1.1                                        | -                 | -                                                     |
| Pretreatment NH <sub>3</sub> :dry biomass | -                                          | 0.3               | 0.3                                                   |
| Pretreatment Temp (deg C)                 | 190                                        | 90                | 90                                                    |
| Pretreatment Solids (wt. %)               | 30                                         | 50                | 50                                                    |
| Bioconversion Method                      | SSF                                        | CBP               | SSF                                                   |
| C6 Enzymatic Hydrolysis Yield (%)         | 80                                         | 95                | 80                                                    |
| C6 Fermentation Yield (%)                 | 90                                         | 95                | 90                                                    |
| C5 Fermentation Yield (%)                 | 90                                         | 95                | 90                                                    |
| Bioconversion Residence Time (days)       | 7                                          | 1.5               | 7                                                     |
| Enzyme Loading (mg/g cellulose)           | 15                                         | -                 | 15                                                    |
| Ethanol titer (mass %)                    | 5                                          | 5                 | 5                                                     |

<sup>a</sup>Base-case values are listed, with individual improvements as specified in the text.

Table S3. Financial parameter values.

| Parameter                             | Value               |
|---------------------------------------|---------------------|
| Financing                             | 40% debt/60% equity |
| Loan Rate                             | 7.5%                |
| Discount Rate                         | 12%                 |
| Return on Equity                      | 15%                 |
| Plant Economic Life                   | 25 years            |
| General Plant Depreciation            | 200% DB (MACRS)     |
| General Plant Recovery Period         | 7 years             |
| Power Plant Depreciation              | 150% DB (MACRS)     |
| Power Plant Recovery Period           | 20 years            |
| Federal Tax Rate                      | 39%                 |
| Construction Period                   | 2.5 years           |
| 1 <sup>st</sup> 6 months expenditures | 8%                  |
| Next 12 months expenditures           | 60%                 |
| Last 12 months expenditures           | 32%                 |
| Start-Up Time                         | 6 months            |
| Revenues                              | 50%                 |
| Variable Costs                        | 75%                 |
| Fixed Costs                           | 100%                |
| Resulting capital charge rate         | 16.7%               |

## Supplemental Material References

1. Greene, N., et al. Growing energy: How biofuels can help end America's oil dependence (Natural Resources Defense Council, New York, USA, 2004).
2. American Coalition for Ethanol. (<http://www.ethanol.org/>, 2007).
3. Sheehan, J., Camobreco, V., Duffield, J., Graboski, M. & Shapouri, H. Life cycle inventory of biodiesel and petroleum diesel for use in an urban bus. (National Renewable Energy Laboratory, NREL/SR-580-24089 UC Category 1503, Golden, CO, 1998).
4. McLaughlin, S.B., Kiniry, J.R., Taliaferro, C., & Ugarte, D. Projecting yield and utilization potential of switchgrass as an energy crop. *Advances in Agronomy*, 90:267-297.
5. United States Department of Agriculture, National Agricultural Statistics Service. (<http://www.nass.usda.gov/>, 2007).
6. Wooley, R. et al. Lignocellulosic biomass to ethanol process design and economics utilizing co-current dilute acid prehydrolysis and enzymatic hydrolysis: current and futuristic scenarios. NREL/TP-580-26157. (National Renewable Energy Laboratory, Golden, CO, 1999).
7. Aden, A. et al. Lignocellulosic biomass to ethanol process design and economics utilizing co-current dilute acid prehydrolysis and enzymatic hydrolysis for corn stover. NREL/TP-510-32438. (National Renewable Energy Laboratory, Golden, CO, 2002).
8. Lynd, L.R., & Grethlein, H.E. Distillation with intermediate heat pumps and optimal sidestream return. *AIChE Journal*, 32(8):1347-1359 (1986).
